# Supplementary material for: Universal open MHC-I molecules for rapid peptide loading and enhanced complex stability across HLA allotypes
Source: PubMed Central journal article supplement — Proc Natl Acad Sci U S A. 2023 Jun 13;120(25):e2304055120. doi: 10.1073/pnas.2304055120 (PMC10288639; doi:10.1073/pnas.2304055120), 2023-06-13
Supplement: pnas.2304055120.sapp.pdf [file pnas.2304055120.sapp.pdf]

## Supplementary Information

### Universal open MHC-I molecules for rapid peptide loading and enhanced complex stability across HLA allotypes.

<sup>1,2</sup>Yi Sun<sup>†</sup>, <sup>1,2</sup>Michael C. Young<sup>†</sup>, <sup>1,2</sup>Claire H. Woodward<sup>†</sup>, <sup>1,2</sup>Julia N. Danon, <sup>3</sup>Hau V. Truong, <sup>1,2</sup>Sagar Gupta, <sup>2</sup>Trenton J. Winters, <sup>4</sup>Joan Font-Burgada, <sup>2,3</sup>George M. Burslem, and <sup>1,2</sup>Nikolaos G. Sgourakis\*

<sup>1</sup>Center for Computational and Genomic Medicine, Department of Pathology and Laboratory Medicine, The Children's Hospital of Philadelphia, Philadelphia, PA, 19104, USA

<sup>2</sup>Department of Biochemistry and Biophysics, Perelman School of Medicine, University of Pennsylvania, 3401 Civic Center Blvd, Philadelphia, PA, 19104, USA

<sup>3</sup>Department of Cancer Biology and Epigenetics Institute, Perelman School of Medicine, University of Pennsylvania, Philadelphia, PA, 19104, USA

<sup>4</sup>Cancer Signaling and Microenvironment Program, Fox Chase Cancer Center, Philadelphia, PA, 19111, USA

<sup>†</sup>Contributed equally to this work.

\*Correspondence: Nikolaos G. Sgourakis

Email: [Nikolaos.Sgourakis@Pennmedicine.upenn.edu](mailto:Nikolaos.Sgourakis@Pennmedicine.upenn.edu)

#### This PDF file includes:

Supplemental Methods

Supplementary Figure S1 to S11

Tables S1 to S4

## 30 Supplemental Methods

31

32 **Peptides and ligands.** All peptide sequences are given as standard single-letter codes. Peptides for  
33 different HLA allotypes were selected by NetMHCpan4.1(1) and purchased from Genscript, Piscataway,  
34 USA, at >90% purity. L- $\beta$ -Phenylalanine ( $\beta$ F) containing placeholder peptides were synthesized in-house  
35 on 2-chlorotrityl resin using a CEM Liberty Blue automated microwave peptide synthesizer from Fmoc  
36 protected amino acids (including Fmoc- $\beta$ -Phe-OH) employing iterative cycles of N, N'-  
37 Diisopropylcarbodiimide (DIC)/Ethyl cyanohydroxyiminoacetate (Oxyma) mediated coupling and piperidine  
38 mediated deprotection, both under microwave irradiation. Peptides were deprotected and cleaved from the  
39 resin by treatment with trifluoroacetic acid/water/triisopropylsilane/phenol (88:5:5:2) for 1-3 hours. The  
40 solvent was removed under a flow of nitrogen, and peptides were precipitated with ice-cold ether. Peptides  
41 were subsequently purified by reverse phase chromatography eluting with 5-95% acetonitrile in water  
42 containing 0.05% trifluoroacetic acid over a C18 column. Peaks containing peptides were identified by LC-  
43 MS, pooled, and concentrated in vacuo to yield a colorless solid. Photosensitive peptides were purchased  
44 from Biopeptek Inc, Malvern, USA, or synthesized in-house using Fmoc-3-amino-3-(2-nitrophenyl)-  
45 propionic acid (J). Peptides were solubilized in distilled water and centrifuged at 14000 rpm for 15 minutes.  
46 The concentration of each peptide solution was measured and calculated using the respective absorbance  
47 and extinction coefficient at 205 nm wavelength. MR1 C262S ligand acetyl-6-formylpterin (Ac-6-FP) and  
48 diclofenac (DCF) were purchased from Cayman Chemical (#23303) and Sigma D6899-10G.

49

50 **TCGA peptide selection.** The 1018 putative driver mutations used in Marty et al. (pmid: 29107334 ) were  
51 selected to produce all possible 8-11-mer peptides containing each mutation and screened for HLA-A02:01  
52 binding with NetMHCPan4.0. A cutoff of 400 nM predicted affinity was applied, and remaining peptides  
53 were ranked by mutation frequency across TCGA patients. The top 50 ranked peptides were selected for  
54 the study.

55

56 **Recombinant protein expression, refolding, and purification.** Plasmid DNA encoding the BirA  
57 Substrate Peptide (BSP, LHHILDAQKMVWNHR)-tagged luminal domain of MHC-I heavy chains and  
58 human  $\beta_2m$  were provided by the NIH tetramer facility (Emory University) and transformed into *Escherichia*  
59 *coli* BL21(DE3) cells (New England Biolabs). Open heavy chains (G120C) and  $\beta_2m$  (H31C) were generated  
60 using site-directed mutagenesis and transformed into *Escherichia coli* BL21(DE3) cells using the pET-  
61 22b(+) vector. Cells were grown and harvested in the Luria-Broth medium, and inclusion bodies were  
62 pelleted and purified as previously described(2). For the generation of pMHC-I molecules, *in vitro* refolding  
63 was performed by slowly diluting a 100 mg mixture of either wild type (WT) or open MHC-I and  $\beta_2m$  at a  
64 1:3 molar ratio over 4 hours in refolding buffer (0.4 M L-Arginine HCl, 100 mM Tris pH 8, 2 mM EDTA, 5  
65 mM reduced L-glutathione, 0.5 mM oxidized L-glutathione) supplemented with 10 mg of the peptide. The  
66 mixture was protected from light when refolded with photosensitive peptides. Refolding proceeded for 4

67 days, and proteins were purified by size exclusion chromatography (SEC) using a HiLoad 16/600 Superdex  
68 75 pg column at 1 mL/min with 150 mM NaCl, 20 mM Tris buffer, pH 8.0. Purified proteins were further  
69 confirmed in reduced and non-reduced conditions using sodium dodecyl sulfate-polyacrylamide (SDS-  
70 PAGE) gel electrophoresis. MR1 refolding was performed by diluting a 90 mg mixture of either WT or open  
71 HC and  $\beta_2m$  at a 1:1.3 molar ratio overnight in refolding buffer supplemented with 5 mg of DCF or Ac-6-FP.  
72 Protein purification was performed as described above.

73

74 **Differential Scanning Fluorimetry.** Differential Scanning Fluorimetry (DSF) was used to assess the  
75 thermal stabilities of the WT and the open pMHC-I protein complexes. 7  $\mu$ M of placeholder peptide-loaded  
76 MHC-I molecules were incubated with the desired peptide at a 1:10 molar ratio at room temperature (RT)  
77 overnight and then mixed with 10X SYPRO Orange dye in PBS buffer (150 mM NaCl, 20 mM sodium  
78 phosphate, pH 7.2) to a final volume of 20  $\mu$ L. Samples were loaded into MicroAmp Optical 384 well plate  
79 and ran in triplicates. The experiment was performed on a QuantStudio™ 5 Real-Time PCR machine with  
80 excitation and emission wavelengths set to 470 nm and 569 nm. The temperature was incrementally  
81 increased at a rate of 1°C per minute between 25°C and 95°C. Data analysis and fitting were performed in  
82 GraphPad Prism v9. To determine the percent unfolding, WT and open HLA-A\*02:01/KILGFVJV were UV  
83 irradiated for 0, 10, 20, 30, 40, 50, and 60 minutes. The full DSF traces were recorded at a constant rate of  
84 1°C per minute between 25°C and 95°C. The fluorescence intensity (I) at 25°C was then normalized against  
85 the maximum I. Data analysis and fitting were performed in GraphPad Prism v9.

86

87 **NMR sample preparation and backbone resonance assignment.** NMR samples of WT and open HLA-  
88 A\*02:01/ $\beta_2m$ /MART1 complex were prepared with an [<sup>15</sup>N, <sup>13</sup>C, <sup>2</sup>H] isotope-selective labeling scheme using  
89 established protocols and reagents(3, 4). The HC and  $\beta_2m$  components were each isotopically labeled  
90 independently using M9 media in *E. coli*(13) and refolded with the complementary complex components  
91 expressed at natural isotopic abundance, as described previously for the same system, to generate two  
92 NMR samples each for open and WT. Samples in the concentration range of 50 to 150  $\mu$ M were prepared  
93 in a standard NMR buffer (150 mM NaCl, 20 mM sodium phosphate pH 7.2, 0.001 M sodium azide, 5%  
94 D<sub>2</sub>O) in the presence of 2-fold molar excess of MART1 peptide, and all datasets were collected at 298-300  
95 K. Backbone resonance assignments for the WT complexes were derived using a series of TROSY-based  
96 2D and 3D experiments recorded at a <sup>1</sup>H field of 600 or 800 MHz following a multi-pronged approach  
97 described previously for a similar system(5), including HNCO, HNCA, and HN(CA)CB triple-resonance  
98 experiments and SOFAST-based Hn-NHn NOESY experiments recorded at 800 MHz(6–10). Assignments  
99 were then transferred to the spectra of the open complexes and confirmed by TROSY-readout triple-  
100 resonance experiments (HNCO, HNCA, and HN(CA)CB), recorded at 600 MHz. Final backbone  
101 assignments were verified using the TALOS-N server (11) and deposited in the Biological Magnetic  
102 Resonance Bank (IDs: 51101 and 51781). For chemical shift perturbation calculations, the WT and open  
103 TROSY NMR spectra were aligned to each other using a residue far from the mutation sites as a reference

104 based on an existing crystal structure, in a region where open and WT peaks were perfectly overlapped  
105 (HLA-A\*02:01\_E254 and  $\beta_2m\_D96$ ; PDB ID: 3mrq). Amide backbone chemical shift perturbations between  
106 the WT and the open variant were calculated using the following equation, given the aligned  $^{15}N$  and  $^1H$   
107 chemical shifts:  $\Delta\delta(ppm) = \sqrt{(\Delta\delta_H)^2 + \left(\frac{\Delta\delta_N}{10}\right)^2}$ . All NMR data were processed with NMRPipe and analyzed  
108 using NMRFAM-SPARKY and POKY(12, 13).

109  
110 **Hydrogen/Deuterium exchange mass spectrometry.** The open HLA-A\*02:01/KILGFVFJV was dialyzed  
111 into equilibration buffer (150 mM NaCl, 20 mM sodium phosphate, pH 6.5 in H<sub>2</sub>O) and diluted to a stock  
112 concentration of 30  $\mu$ M and then either i) kept on ice without exposure to UV light or ii) UV-exposed for 45  
113 min at 4°C. Samples were prepared and injected manually for several deuterium-exchange incubation  
114 periods. 5  $\mu$ L open HLA-A\*02:01/KILGFVFJV (30  $\mu$ M) with or without UV-irradiation were diluted with 20  
115  $\mu$ L equilibration buffer (all H experiments, 0 s) or deuterium buffer (150 mM NaCl, 20 mM sodium phosphate  
116 pD 6.5 in D<sub>2</sub>O) to 6  $\mu$ M. The proteins were incubated with deuterium buffer for 20, 180, and 600 seconds  
117 at RT, and 15 minutes at 43°C for open HLA-A\*02:01/KILGFVFJV or at 34°C for UV-irradiated open HLA-  
118 A\*02:01/KILGFVFJV as all the D samples for  $\Delta$ Mass<sub>100%</sub>. The samples were then quenched with an equal  
119 volume of acidic buffer (150 mM NaCl, 1 M TCEP, 20 mM sodium phosphate pH 2.35 in H<sub>2</sub>O, 25  $\mu$ L).  
120 Quenched proteins were immediately injected for LC-MS/MS, in which integrated pepsin digestion was  
121 performed using a C8 5  $\mu$ M column and a Q Exactive Orbitrap Mass Spectrometer. Peptide fragments  
122 corresponding to HLA-A\*02:01 and  $\beta_2m$  were identified using Thermo Proteome Discoverer v2.4. The  
123 percent deuterium uptake was back-exchange corrected for each time point using the following  
124 equation(14):  $D = \frac{\Delta Mass_T - \Delta Mass_0\%}{\Delta Mass_{100\%} - \Delta Mass_0\%}$ . ExMs2 program was used to identify and analyze deuterated peptides.  
125 Measured deuterium uptakes for peptide fragments at 600s were averaged to each amino acids based on  
126 the start and end position of the peptide. The kinetic plots and the scaled B factor for the structure plot were  
127 generated by python3 and PyMOL(15).

128  
129 **Fluorescence polarization.** The kinetic association of fluorescently labeled peptides and various peptide-  
130 loaded MHC-I was monitored by fluorescence polarization (FP). An optimized concentration of a  
131 fluorophore-labeled peptide (determined via serial dilution that yields a polarization baseline between 0 and  
132 50 mP) was solubilized in FP buffer (150 mM NaCl, 20 mM sodium phosphate, 0.05% Tween-20, pH 7.4).  
133 MHC-I proteins and fluorophore-labeled peptides were directly added to the plate to 100  $\mu$ L per well to  
134 avoid extended incubation and loss of data. The kinetic association was monitored for 2-12 hours, and  
135 polarization measurements were recorded every 28-105 seconds. The WT or open pMHC-I concentration  
136 remained constant across experiments at 200 nM, except for the MHC titration assays. Excitation and  
137 emission values used to monitor the fluorescence of TAMRA-labeled peptides were 531 and 595 nm, and  
138 FITC-labeled peptides were 475 and 525 nm. All experiments were performed in triplicates at RT. For IC<sub>50</sub>  
139 competition assays, a serial dilution of competitor peptide was added to 200 nM WT or open pMHC-I and

140 the optimal concentration of fluorophore-labeled peptide. Kinetic association measurements were collected.  
141 Non-linear regression fitting allowed calculating plateau polarization (mP) values for each kinetic curve. Log  
142 transformed values of each peptide concentration were plotted against the plateau mP value, and an IC<sub>50</sub>  
143 curve was fit using log(inhibitor) vs. response (three parameters) curve from GraphPad Prism v9. Raw  
144 parallel (I<sub>||</sub>) and perpendicular emission intensities (I<sub>⊥</sub>) were collected and converted to polarization (mP)  
145 values using the equation  $1000 * [(I_{||} - (G * I_{\perp})) / (I_{||} + (G * I_{\perp}))]$ . An optimized G-factor was determined to be 0.33  
146 for TAMRA-labeled peptides and 0.4 for FITC-labeled peptides in calculating baseline fluorescence and  
147 overall FP. The data analysis method was adapted and data was fitted in GraphPad Prism v9(16).

148  
149 **Biotinylation and tetramer formation.** Biotinylation and tetramer formation of the WT and open HLA-  
150 A\*02:01/KILGFV $\beta$ FV proteins were performed as previously described(17). The BSP-tagged proteins  
151 were biotinylated using the BirA biotin-protein ligase bulk reaction kit (Avidity) according to the  
152 manufacturer's instructions and prepared at a final concentration of 2 mg/mL monomer. The level of  
153 biotinylation was evaluated by SDS-PAGE gel shift assay in the presence of excess streptavidin.  
154 Biotinylated WT and open HLA-A\*02:01/KILGFV $\beta$ FV were then mixed with 10-fold molar excess of the  
155 NYESO-1 peptide variants, SLLMWITQV, SLLMWITQC, and SLLMWITQA. Each reaction was incubated  
156 2 hours at room temperature and the peptide exchange reactions were confirmed by DSF. Meanwhile,  
157 streptavidin-PE (Agilent Technologies, Inc.) at 4:1 monomer/streptavidin molar ratio was added to HLA-  
158 A\*02:01/KILGFV $\beta$ FV in the presence of excess peptides over 10-time intervals every 10 mins at RT in the  
159 dark. Tetramerized molecules upon peptide exchange were washed using Amicon Ultra centrifugal filter  
160 units with a 100 kDa membrane cut-off. Biotinylated WT and open HLA-A\*02:01/KILGFV $\beta$ FV proteins,  
161 which did not require peptide exchange, were prepared the same way as peptide exchanged molecules  
162 incubating the same amount of buffer. The resulting tetramers can be stored at 4°C for up to 4 weeks.

163  
164 **1G4 TCR lentivirus production.** Lenti-X 293T cells (Takara) were cultured in DMEM (Gibco), 10% FBS  
165 (Gibco), and Glutamax (Gibco) and were plated one day before transfection. Cells were transfected at a  
166 confluency of 80-90% with TransIT-293 (Mirus) using pMD2.G (Addgene #12259, gift from Didier Trono),  
167 psPAX2 (Addgene #12260, gift from Didier Trono), and pSFFV-1G4. Virus-containing media was collected  
168 24- and 48-hours post-transfection, clarified by centrifugation at 500 g for 10 min, and incubated with Lenti-  
169 X concentrator (Takara) for at least 24 hours. Virus was pooled and concentrated 50-100x, resuspended in  
170 PBS, aliquoted, and stored at -80°C for subsequent T cell infections.

171  
172 **Primary human T cell tetramer staining.** Healthy donor T cells were processed by the Human  
173 Immunology Core at the University of Pennsylvania by magnetic separation of CD8+ T cells. Cells were  
174 cultured in Advanced RPMI (Gibco), 10% heat inactivated FBS (Gibco), Glutamax (Gibco),  
175 penicillin/streptomycin (Gibco), and 10mM HEPES (Quality Biological), supplemented with 300 U/mL  
176 recombinant IL-2 (NCI Biological Resources Branch). T cells were maintained at ~1 million cells/mL and

177 were activated with a 1:1 ratio of Dynabeads Human T-Activator CD3/CD28 beads (Gibco) for 48 hours. 24  
178 hours after initial activation, cells were either left untransduced or transduced with lentivirus expressing the  
179 1G4 TCR. Cells were debeaded by magnetic separation and expanded in the presence of IL-2.  
180 Transduction efficiency was determined by staining with an anti-V $\beta$ 13.1-APC antibody (Miltenyi Biotec.),  
181 typically greater than 50%. Cells were cryopreserved with CryoStor CS10 (StemCell Technologies).  
182 Thawed T cells were recovered and regrown in IL-2-containing complete media for ~3 days prior to staining.  
183 Cells were harvested and washed with PBS/1% BSA/2 mM EDTA with 5  $\mu$ g/mL PE-conjugated tetramer  
184 and incubated for 25 min at room temperature with slight shaking. After two washes with an RPMI-based  
185 wash buffer containing 1% FBS, cells were resuspended in 1:1000 Sytox Blue diluted in wash buffer to  
186 distinguish dead cells. Samples were processed on an CytoFLEX LX and the data analyzed by FlowJo  
187 v10.8.1.

188 **References**

- 189 1. B. Reynisson, B. Alvarez, S. Paul, B. Peters, M. Nielsen, NetMHCpan-4.1 and NetMHCIIpan-4.0:  
190 improved predictions of MHC antigen presentation by concurrent motif deconvolution and  
191 integration of MS MHC eluted ligand data. *Nucleic Acids Research* **48**, W449 (2020).
- 192 2. H. Li, K. Natarajan, E. L. Malchiodi, D. H. Margulies, R. A. Mariuzza, Three-dimensional structure of  
193 H-2Dd complexed with an immunodominant peptide from human immunodeficiency virus  
194 envelope glycoprotein 12011 Edited by I. A. Wilson. *Journal of Molecular Biology* **283**, 179–191  
195 (1998).
- 196 3. A. C. McShan, *et al.*, Molecular determinants of chaperone interactions on MHC-I for folding and  
197 antigen repertoire selection. *Proc. Natl. Acad. Sci. U.S.A.* **116**, 25602–25613 (2019).
- 198 4. V. Tugarinov, V. Kanelis, L. E. Kay, Isotope labeling strategies for the study of high-molecular-weight  
199 proteins by solution NMR spectroscopy. *Nat Protoc* **1**, 749–754 (2006).
- 200 5. K. Natarajan, *et al.*, An allosteric site in the T-cell receptor C $\beta$  domain plays a critical signalling role.  
201 *Nat Commun* **8**, 15260 (2017).
- 202 6. P. Rossi, Y. Xia, N. Khanra, G. Veglia, C. G. Kalodimos, 15N and 13C- SOFAST-HMQC editing enhances  
203 3D-NOESY sensitivity in highly deuterated, selectively [1H,13C]-labeled proteins. *J Biomol NMR* **66**,  
204 259–271 (2016).
- 205 7. D. Marion, L. E. Kay, S. W. Sparks, D. A. Torchia, A. Bax, Three-dimensional heteronuclear NMR of  
206 nitrogen-15 labeled proteins. *J. Am. Chem. Soc.* **111**, 1515–1517 (1989).
- 207 8. M. Salzmann, K. Pervushin, G. Wider, H. Senn, K. Wüthrich, TROSY in triple-resonance experiments:  
208 New perspectives for sequential NMR assignment of large proteins. *Proc Natl Acad Sci U S A* **95**,  
209 13585–13590 (1998).
- 210 9. S. Grzesiek, A. Bax, Improved 3D triple-resonance NMR techniques applied to a 31 kDa protein.  
211 *Journal of Magnetic Resonance (1969)* **96**, 432–440 (1992).
- 212 10. L. E. Kay, M. Ikura, R. Tschudin, A. Bax, Three-dimensional triple-resonance NMR spectroscopy of  
213 isotopically enriched proteins. *Journal of Magnetic Resonance (1969)* **89**, 496–514 (1990).
- 214 11. Y. Shen, A. Bax, Protein backbone and sidechain torsion angles predicted from NMR chemical shifts  
215 using artificial neural networks. *J Biomol NMR* **56**, 227–241 (2013).
- 216 12. F. Delaglio, *et al.*, NMRPipe: a multidimensional spectral processing system based on UNIX pipes. *J*  
217 *Biomol NMR* **6**, 277–293 (1995).
- 218 13. W. Lee, *et al.*, Backbone resonance assignments and secondary structure of Ebola nucleoprotein  
219 600-739 construct. *Biomol NMR Assign* **13**, 315–319 (2019).
- 220 14. G. R. Masson, *et al.*, Recommendations for performing, interpreting and reporting hydrogen  
221 deuterium exchange mass spectrometry (HDX-MS) experiments. *Nat Methods* **16**, 595–602 (2019).
- 222 15. Schrödinger, LLC, The PyMOL Molecular Graphics System, Version 1.8 (2015).

- 223 16. R. Buchli, *et al.*, Real-Time Measurement of in Vitro Peptide Binding to Soluble HLA-A\*0201 by  
224 Fluorescence Polarization. *Biochemistry* **43**, 14852–14863 (2004).
- 225 17. S. A. Overall, *et al.*, High throughput pMHC-I tetramer library production using chaperone-mediated  
226 peptide exchange. *Nature Communications* **11**, 1909 (2020).
- 227 18. X. Robert, P. Gouet, Deciphering key features in protein structures with the new ENDscript  
228 server. *Nucleic Acids Res* **42**, W320–W324 (2014).
- 229 19. M. C. F. Thomsen, M. Nielsen, Seq2Logo: a method for construction and visualization of amino acid  
230 binding motifs and sequence profiles including sequence weighting, pseudo counts and two-sided  
231 representation of amino acid enrichment and depletion. *Nucleic Acids Research* **40**, W281–W287  
232 (2012).
- 233 20. D. J. Barker, *et al.*, The IPD-IMGT/HLA Database. *Nucleic Acids Res*, gkac1011 (2022).
- 234 21. F. Sievers, *et al.*, Fast, scalable generation of high-quality protein multiple sequence alignments  
235 using Clustal Omega. *Mol Syst Biol* **7**, 539 (2011).
- 236



237 Supplemental Figures

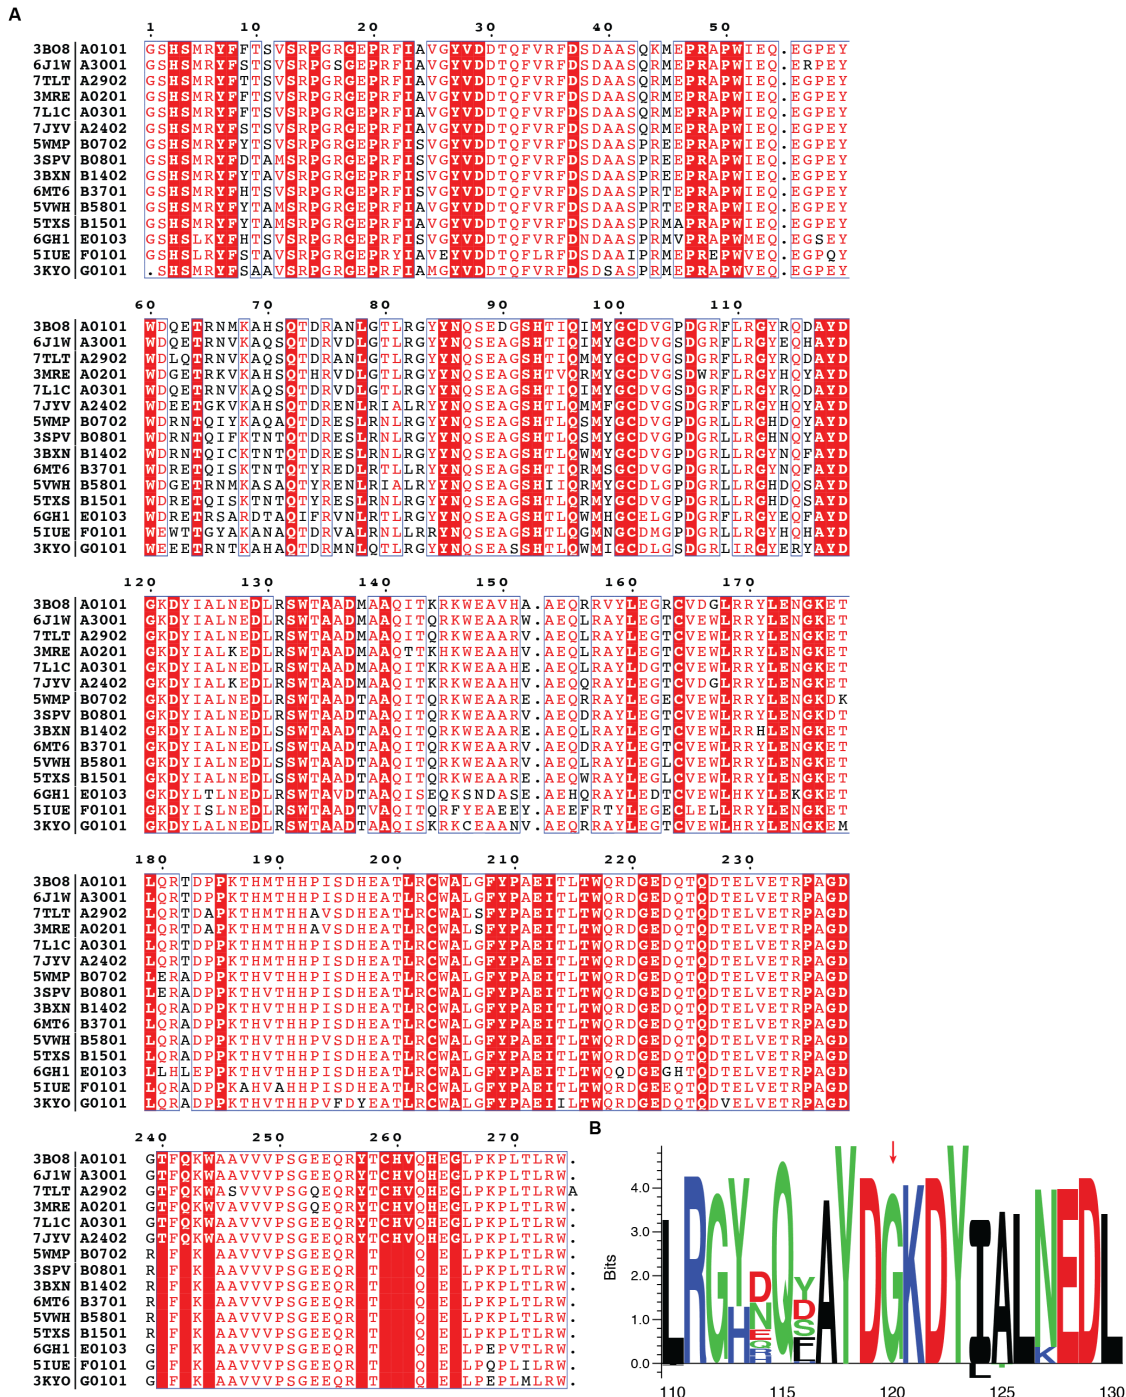

238  
 239 **Figure S1. Sequence alignment of distinct HLA allotypes across HLA-A, B, and C as well as HLA-Ib.**  
 240 **A.** Sequence alignment of the HLA representatives were extracted from the Protein data bank and  
 241 processed using ESPrpt(18), covering HLA-A and HLA-B supertypes as well as HLA-Ib, PDB ID as  
 242 indicated. **B.** Seq2logo visualization(19) of the sequence alignment for 75 distinct HLA allotypes with >1%  
 243 global population frequency shows a conserved residue G120. Sequence weighting used clustering,

244 pseudo count with a weight of 0, and Kullback–Leibler logotype. The percentage frequency of amino acids  
245 on a specific position higher than 10% is shown on the positive y-axis, and less than 10% amino acids on  
246 the negative y-axis. Allele sequences were derived from the IPD-IMGT/HLA(20) and the alignment was  
247 performed using ClustalOmega(21).

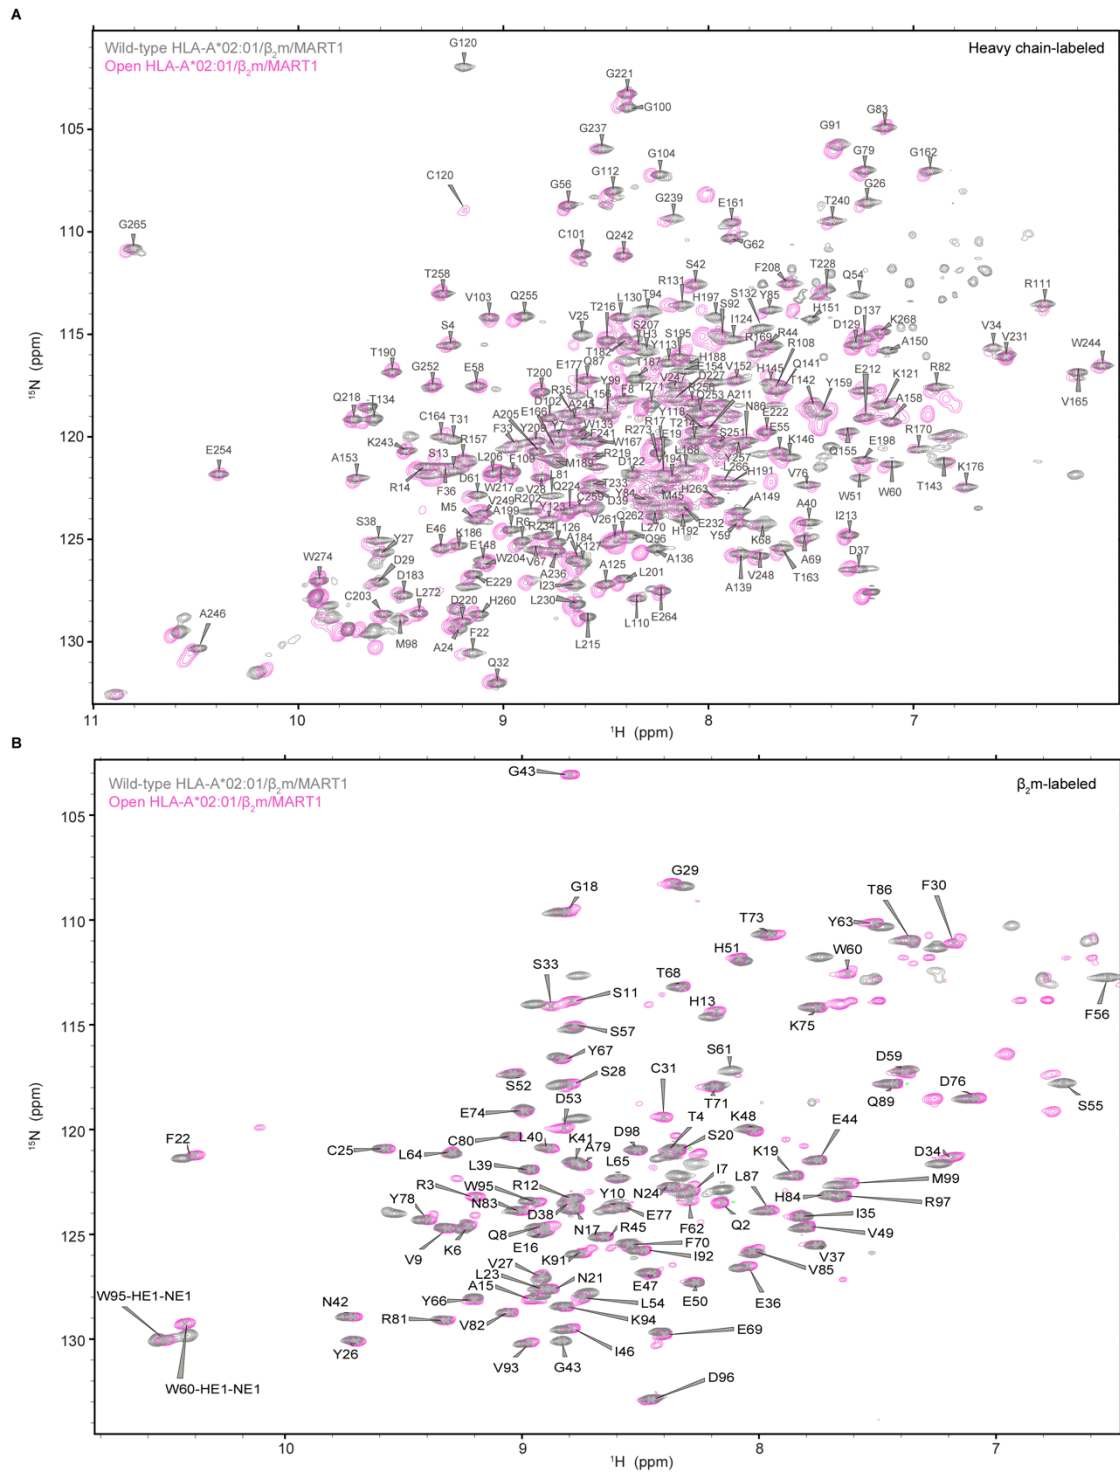

248  
 249 **Figure S2. Overlay of the WT and open MHC-I NMR spectra reveal substantial backbone chemical**  
 250 **shift changes.** 2D  $^1\text{H}$ - $^{15}\text{N}$  TROSY spectra of [ $^1\text{H}$ ,  $^{13}\text{C}$ ,  $^{15}\text{N}$ ]-labeled **A.** HC (HLA-A\*02:01) refolded with  
 251 unlabeled light chain ( $\beta_2$ m) and MART1 (ELAGIGILTV), or **B.**  $\beta_2$ m bound to unlabeled HC and MART1.  
 252 Spectra represent the WT complex collected at 800 MHz  $^1\text{H}$  magnetic field (in gray), overlaid by the open

253 complex spectra collected at 600 MHz  $^1\text{H}$  magnetic field (in pink). All data were collected with identical  
254 buffer conditions (20 mM sodium phosphate, pH 7.2, and 150 mM NaCl) and at RT (298-300 K).

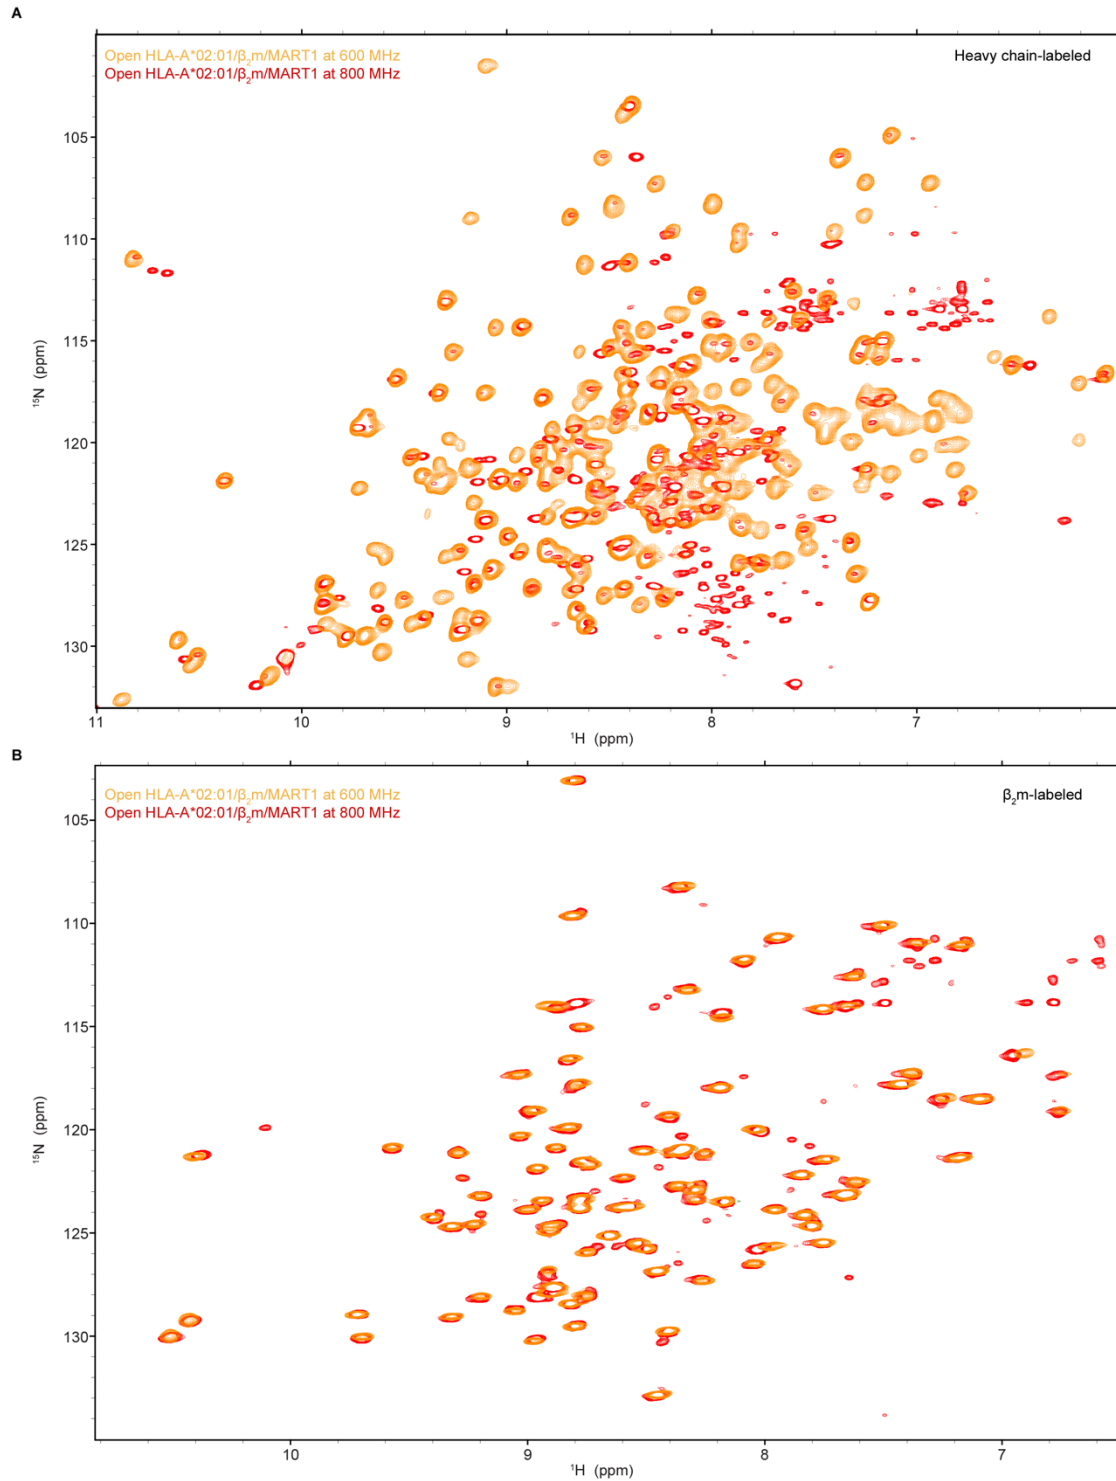

255  
 256 **Figure S3. Overlay of NMR spectra for the open MHC-I confirms the same backbone chemical shifts**  
 257 **regardless of the magnetic field.** <sup>1</sup>H-<sup>15</sup>N TROSY data collected for the open HLA-A\*02:01/β<sub>2</sub>m/ MART1  
 258 at both 600 MHz (orange) and 800 MHz (red) for [<sup>1</sup>H, <sup>13</sup>C, <sup>15</sup>N]-labeled HC refolded with β<sub>2</sub>m and MART1  
 259 (top), or β<sub>2</sub>m bound to unlabeled HC and MART1 (bottom). Additional peaks in the spectra collected at 800  
 260 MHz are largely due to protein degradation and do not affect the chemical shifts corresponding to the protein

261 backbone. All data were collected with identical buffer conditions (20 mM sodium phosphate, pH 7.2, and  
262 150 mM NaCl) and at RT (298-300 K).

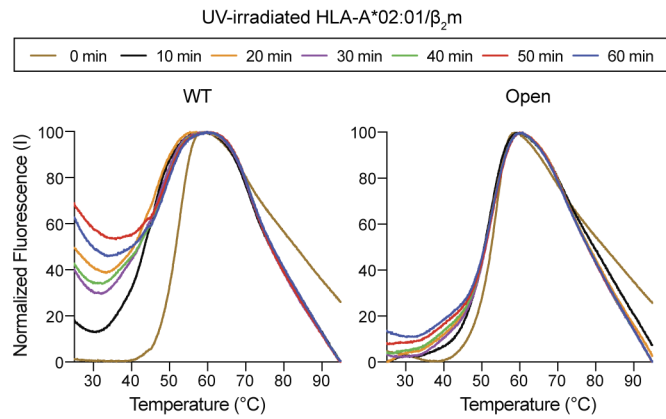

263

264

**Figure S4. Differential Scanning Fluorimetry curves of UV-irradiated WT or open HLA-A\*02:01/β<sub>2</sub>m.**

265

Thermal stability curves were obtained using DSF for the WT (left) and open (right) HLA-A\*02:01/β<sub>2</sub>m with

266

a photocleavable peptide KILGFVFJV upon UV irradiation without the presence of a rescuing peptide. The

267

duration of UV exposure was indicated by different colors from 0 to 60 mins with intervals of 10 mins.

268

Normalized fluorescence (I) at 25°C was extracted and plotted against the duration of UV exposure in **Fig.**

269

**3A.** Results of three technical replicates (mean ± σ) are plotted.

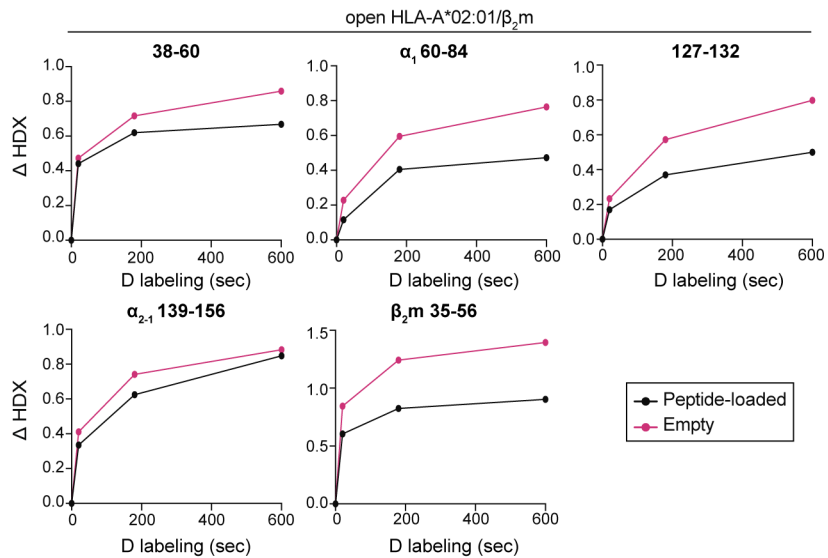

270

271

**Figure S5. Deuterium uptake resolved to individual peptide fragments for open HLA-A\*02:01/ $\beta_2m$ .**

272

Peptide segments of 38-60,  $\alpha_1$  60-84, 127-132,  $\alpha_{2-1}$  139-156, and  $\beta_2m$  35-56 are plotted for each exposure

273

time (0, 20, 180, and 600s). The plots reveal the local HDX profiles of open HLA-A\*02:01 for the states of

274

peptide-loaded (black, refolded with KILGFVFJV) and empty (pink, 40-minute UV irradiation at 4°C).



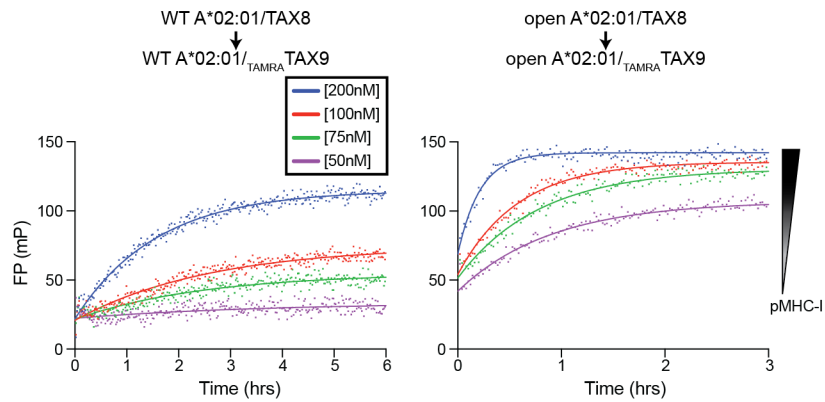

275

276

277

278

279

**Figure S6. Binding of <sub>TAMRA</sub>TAX9 by the WT or open HLA-A\*02:01/TAX8.** Peptide exchange measured by fluorescence polarization (mP) of 40nM <sub>TAMRA</sub>TAX9 as a function of the WT or open HLA-A\*02:01/TAX8 concentrations. Individual traces were fit to a monoexponential association model to determine apparent rate constants  $K_{\text{assoc}}$ , plotted in **Fig. 4D**. Results of three replicates (mean) are plotted.

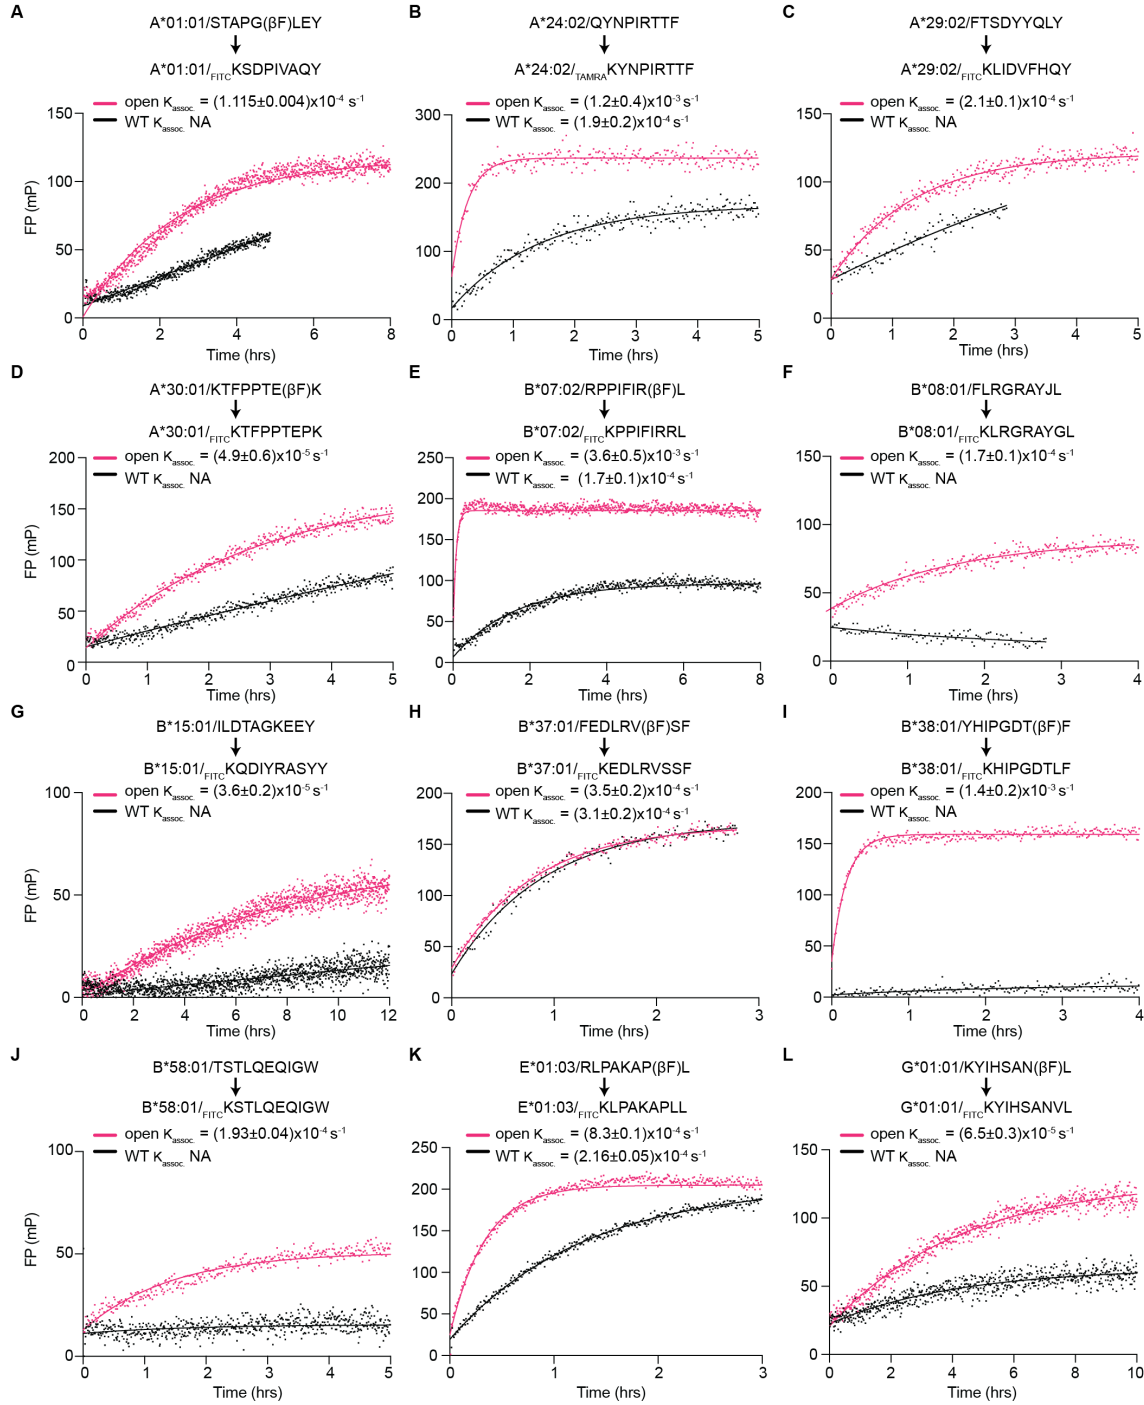

280

281

282

283

284

285

286

**Figure S7. Peptide exchange kinetics of the open vs. WT HLA allotypes. A-L,** The association profiles of fluorophore-conjugated peptides <sub>FITC</sub>KSDPIVAQY, <sub>TAMRA</sub>KYNPIRTTF, <sub>FITC</sub>KLIDVFHQY, <sub>FITC</sub>KTFPPTEPK, <sub>FITC</sub>KPPIFIRRL, <sub>FITC</sub>KLRGRAYGL, <sub>FITC</sub>KQDIYRASY, <sub>FITC</sub>KEDLRVSSF, <sub>FITC</sub>KHIPGDTLF, <sub>FITC</sub>KSTLQEQIGW, <sub>FITC</sub>KLPAKAPLL, and <sub>FITC</sub>KYIHSANVL to the open (pink) and WT (black) HLA- **A.** A\*01:01/STAPG(βF)LEY, **B.** A\*24:02/QYNPIRTTF, **C.** A\*29:02/FTSDYYQLY, **D.** A\*30:01/KTFPPTE(βF)K, **E.** B\*07:02/RPPIFIR(βF)L, **F.** B\*08:01/FLRGRAYJL, **G.** B\*15:01/ILDTAGKEEY, **H.**

287 B\*37:01/FEDLRV( $\beta$ F)SF, I. B\*38:01/YHIPGDT( $\beta$ F)F, J. B\*58:01/TSTLQEQIGW, K.  
288 E\*01:03/RLPAKAP( $\beta$ F)L, and L. G\*01:01/KYIHSAN( $\beta$ F)L. The data were fitted to a monoexponential  
289 association model to determine apparent rate constants  $K_{\text{assoc}}$ . NA means the  $K_{\text{assoc}}$  cannot be fitted.  
290 Results of three replicates (mean  $\pm \sigma$ ) are plotted.

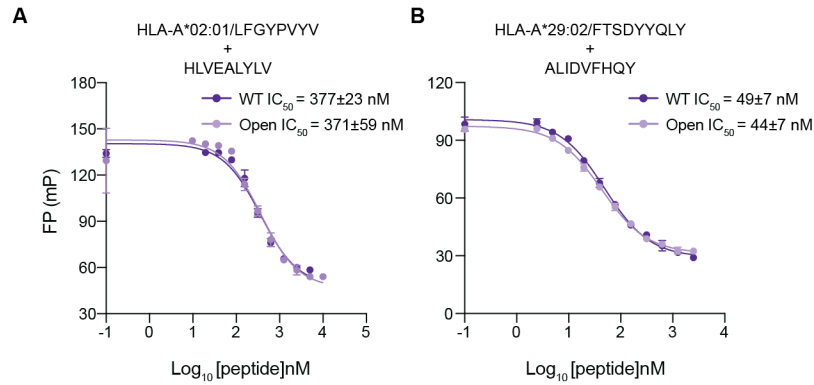

291

292 **Figure S8. Selected T1D epitopes demonstrate the same  $IC_{50}$  profiles for the WT or open MHC-I.**

293 The  $IC_{50}$  profiles extracted from the association profiles of **A.**  $TAMRAKLFQYPVYV$  binding to HLA-

294 A\*02:01/TAX8 and **B.**  $FITCKLIDVFHQY$  binding to HLA-A\*29:02/FTSDYYQLY in a concentration gradient of

295 a competitor HLVEALYLV and ALIDVFHQY peptides, respectively.  $IC_{50}$  values were determined by fitting

296 a log(inhibitor) vs. response (three parameters) curve. Results of three replicates (mean  $\pm \sigma$ ) are plotted.

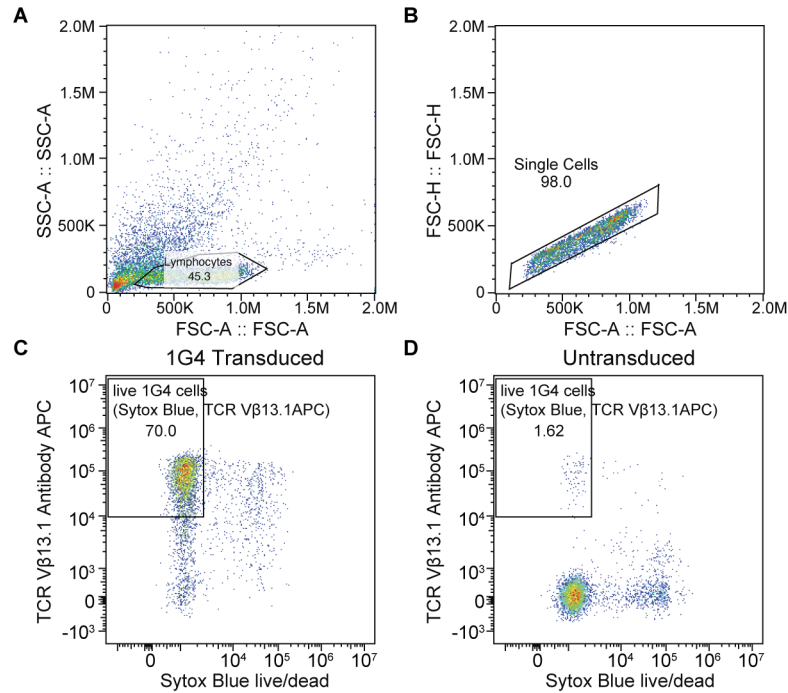

297

298

299

300

301

302

303

304

**Figure S9. Flow cytometry gating strategy of CD8+ T cells transduced with 1G4.** A-B. Previously transduced or non-transduced primary human CD8+ T cells were thawed and recovered before tetramer staining. Cells were sorted by side and forward scatter (A. SSC-A and FSC-A) followed by single cell isolation (B. FSC-A versus FSC-H plot). C-D. Gating for live cells was determined by Sytox blue staining, and transduction efficiency was determined by staining with an anti-Vβ13.1-APC antibody (Miltenyi Biotec). Gates are shown in black, and the percentages of events are gated in parentheses. The acquisition was performed on CytoFLEX LX (Beckman Coulter), and the data were analyzed by FlowJo v10.8.1.

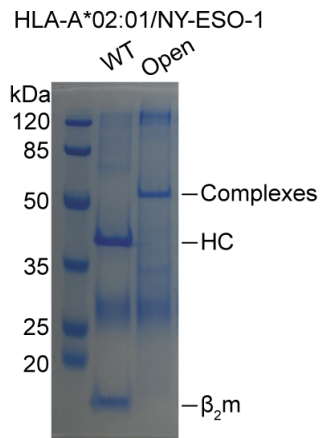

305

306

307

308

**Figure S10. Refolded WT HLA-A\*02:01/NY-ESO-1 upon tetramerization maintain  $\beta_2m$ .** 2  $\mu$ g of WT and open HLA-A\*02:01/NY-ESO-1 in tetrameric form conjugated with fluorophore PE was loaded and ran on an SDS/PAGE gel, confirming the existence of  $\beta_2m$  upon vigorous wash during tetramerization.

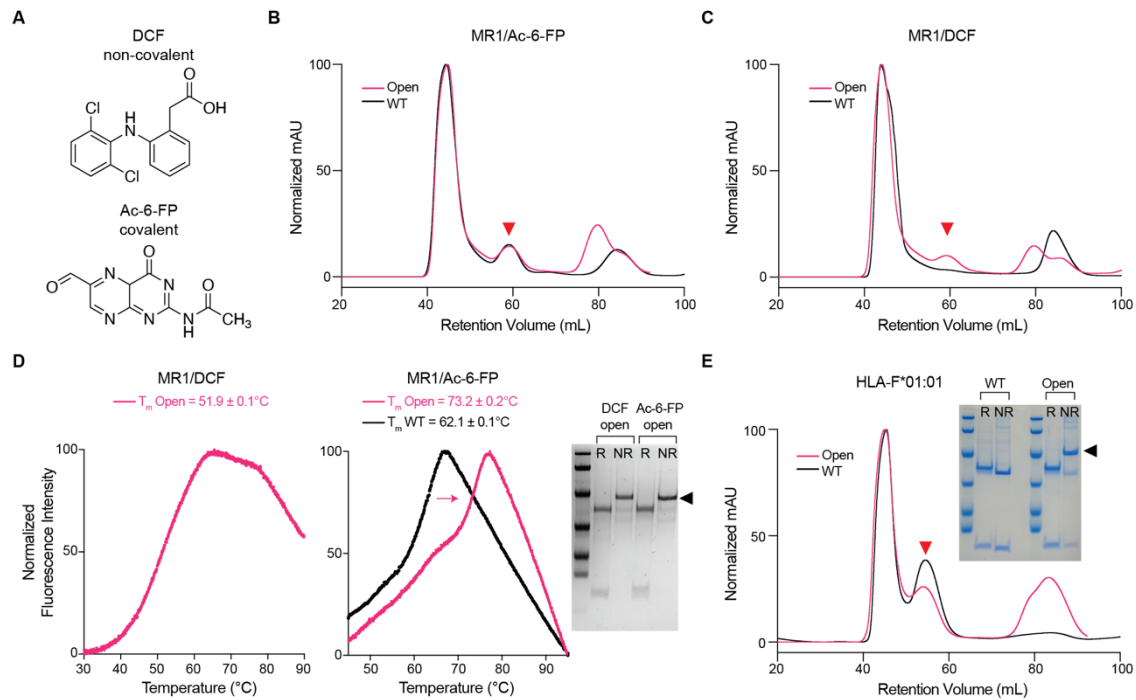

309

310

311

312

313

314

315

316

317

**Figure S11. Disulfide-engineered open MR1 and HLA-F\*01:01 molecules form stable protein complexes.** **A.** Chemical structures of MR1 ligands DCF and Ac-6-FP. **B-C.** SEC traces of the WT (black) and open (pink) MR1 C262S refolded with **B.** Ac-6-FP and **C.** DCF. The triangle arrowhead indicates the protein complexes. **D.** Melting temperature ( $T_m$ , °C) obtained from DSF of the WT (black) and open (pink) MR1 C262S loaded with DCF or Ac-6-FP, which are further confirmed by SDS/PAGE analysis in reduced (R) or non-reduced (NR) conditions. Results of three technical replicates (mean  $\pm$   $\sigma$ ) are plotted. **E.** SEC traces of the WT (black) and open (pink) HLA-F\*01:01/ $\beta_2m$ . The triangle arrowheads indicate the complex peaks, further confirmed by SDS/PAGE analysis in reduced (R) or non-reduced (NR) conditions.

## Supplemental Tables

| #Peptide | Peptide sequence | Wild type           |         | Open                |         |
|----------|------------------|---------------------|---------|---------------------|---------|
|          |                  | T <sub>m</sub> (°C) | σ (±°C) | T <sub>m</sub> (°C) | σ (±°C) |
| 1        | KLVVVGACGV       | 48.81               | 0.11    | 52.19               | 0.09    |
| 2        | LLGRNSFEVHV      | 43.42               | 0.38    | 48.66               | 0.21    |
| 3        | KLVVVGAAAGV      | 48.06               | 0.11    | 51.65               | 0.12    |
| 4        | RLIRVEGNLRV      | 53.37               | 0.25    | 53.33               | 0.17    |
| 5        | KLVVVGASGV       | 46.22               | 0.05    | 49.86               | 0.12    |
| 6        | ALNNMFCQLA       | 44.42               | 0.11    | 51.07               | 0.40    |
| 7        | ILNREIDFA        | 48.69               | 0.07    | 53.00               | 0.18    |
| 8        | KTYPVQLWV        | 49.35               | 0.11    | 54.49               | 0.35    |
| 9        | GLAPPQHRI        | 44.05               | 0.15    | 49.20               | 0.32    |
| 10       | YMFNSSCMGGM      | 48.02               | 0.09    | 53.38               | 0.19    |
| 11       | LLGRNSFEMRV      | 46.24               | 0.07    | 50.78               | 0.13    |
| 12       | GLAPPQRLIRV      | 50.73               | 0.11    | 53.77               | 0.16    |
| 13       | YLSTDVGFCT       | 48.30               | 0.11    | 53.88               | 0.19    |
| 14       | VLMGHVAAVG       | 58.50               | 0.77    | 57.73               | 0.05    |
| 15       | YLDSGIHFG        | 49.90               | 0.13    | 52.78               | 0.47    |
| 16       | KILNREIDFAI      | 46.89               | 0.13    | 52.79               | 0.10    |
| 17       | YMCNSSCMGV       | 60.98               | 3.22    | 58.62               | 0.21    |
| 18       | YSSGFCNIAV       | 43.73               | 0.06    | 49.31               | 0.16    |
| 19       | LLVRNSFEV        | 53.93               | 0.29    | 57.38               | 0.11    |
| 20       | ILWRQDIHLGV      | 53.91               | 0.08    | 57.55               | 0.04    |
| 21       | MFCQLAKTYPV      | 43.67               | 0.23    | 54.24               | 0.36    |
| 22       | LLVRNSFEVRV      | 44.32               | 0.06    | 51.30               | 0.22    |
| 23       | IDILWRQDIHL      | 44.83               | 0.06    | 51.71               | 0.61    |
| 24       | KLVVVGADGV       | 45.08               | 0.11    | 49.77               | 0.09    |
| 25       | GMNWRPILTI       | 42.32               | 0.33    | 50.04               | 0.07    |
| 26       | ILCATYVKV        | 57.41               | 0.36    | 59.44               | 0.12    |
| 27       | LLGRNSFEVLV      | 42.80               | 0.24    | 48.85               | 0.20    |
| 28       | LLDILDTAGL       | 40.96               | 0.05    | 49.75               | 0.09    |
| 29       | CLLDILDTAGL      | 46.69               | 0.04    | 54.21               | 0.22    |
| 30       | FSGEYIPTV        | 56.01               | 0.51    | 58.30               | 0.05    |
| 31       | RPLAWGNINL       | 44.02               | 0.12    | 48.17               | 0.22    |
| 32       | ILNREIDFAI       | 44.95               | 0.08    | 52.01               | 0.14    |
| 33       | GLKDLLNPI        | 53.70               | 0.24    | 54.58               | 0.29    |



|               |             |       |      |       |      |
|---------------|-------------|-------|------|-------|------|
| 34            | YLDSGIHCGA  | 51.99 | 0.38 | 54.34 | 0.20 |
| 35            | FCQLAKTYPV  | 50.19 | 0.27 | 52.29 | 0.10 |
| 36            | ILWRQDIHL   | 55.74 | 0.37 | 58.83 | 0.02 |
| 37            | GLVDEQQEV   | 54.49 | 0.30 | 54.61 | 0.26 |
| 38            | NLLVRNSFEV  | 47.57 | 0.22 | 49.85 | 0.20 |
| 39            | KLVVVGAVGV  | 49.24 | 0.17 | 52.59 | 0.12 |
| 40            | KILCATYVKV  | 47.90 | 0.44 | 51.72 | 0.09 |
| 41            | YLSTDVGFCTL | 50.29 | 0.25 | 54.63 | 0.10 |
| 42            | FMKQMNDAL   | 43.99 | 0.50 | 49.62 | 0.04 |
| 43            | YLDSGIHFGA  | 54.43 | 0.18 | 56.41 | 0.15 |
| 44            | GLAPPQHLTRV | 55.33 | 0.93 | 57.39 | 0.07 |
| 45            | ALNNMFCQL   | 51.43 | 0.78 | 54.62 | 0.51 |
| 46            | LLGRNSFEM   | 47.91 | 0.29 | 51.31 | 0.07 |
| 47            | GLKDLLNPIGV | 48.99 | 0.29 | 52.79 | 0.28 |
| 48            | CQLAKTYPV   | 55.84 | 1.18 | 62.52 | 0.08 |
| 49            | VLHECNSSYI  | 46.60 | 0.20 | 53.12 | 0.19 |
| 50            | KLVVVGAGCV  | 47.64 | 0.13 | 49.39 | 0.09 |
| TAX9          | LLFGYPVYV   | 65.06 | 0.18 | 63.74 | 0.10 |
| P29           | YPNVNIHNF   | 41.99 | 0.15 | 48.72 | 0.07 |
| TAX9 Refolded | LLFGYPVYV   | 64.20 | 0.19 | 64.44 | 0.06 |

319 **Table S1. Thermal stabilities for Cancer Genome Atlas (TCGA) epitope library determined by DSF.**

320  $T_m$  of individual peptides from the TCGA epitope library loaded on WT or open HLA-A\*02:01 were measured  
321 via peptide exchange in triplicates. The high-affinity HLA-A\*02:01-restricted TAX9 peptide and refolded  
322 TAX9/A02 molecules were used as positive controls, and the irrelevant peptide p29 was used as a negative  
323 control.

324

| HLA Supertype | HLA Allele | Placeholder Ligand | Ligand Sequence | Melting Temperature |         |                     |         |
|---------------|------------|--------------------|-----------------|---------------------|---------|---------------------|---------|
|               |            |                    |                 | wild-type           |         | open                |         |
|               |            |                    |                 | T <sub>m</sub> (°C) | σ (±°C) | T <sub>m</sub> (°C) | σ (±°C) |
| A01           | A*01:01    | β-A01              | STAPG(βF)LEY    | 43.75               | 0.02    | 61.2                | 0.5     |
| A0103         | A*30:01    | β-A30              | KTFPTE(βF)K     | 49.18               | 0.08    | 51.05               | 0.09    |
| A0124         | A*29:02    | SARS P44           | FTSDYYQLY       | 53.97               | 0.07    | 53.46               | 0.08    |
| A02           | A*02:01    | TAX8               | LFGYPVYV        | 41.6                | 0.2     | 48.79               | 0.07    |
|               |            | TAX9               | LLFGYPVYV       | 52.36               | 0.09    | 52.98               | 0.09    |
| A24           | A*24:02    | Phox2B             | QYNPIRTTF       | 66.0                | 0.1     | 63.23               | 0.05    |
| B07           | B*07:02    | β-B07              | RPPIFIR(βF)L    | 44.8                | 0.1     | 48.5                | 0.3     |
| B08           | B*08:01    | PhotoB08           | FLRGRAYJL       | 56.5                | 0.2     | 55.93               | 0.07    |
| B27           | B*38:01    | β-B38              | YHIPGDT(βF)F    | 49.4                | 0.2     | 50.7                | 0.1     |
| B44           | B*37:01    | β-B37              | FEDLRV(βF)SF    | 49.0                | 0.5     | 47.8                | 0.5     |
| B58           | B*58:01    | TW10               | TSTLQEIQGW      | 49.3                | 0.2     | 53.1                | 0.4     |
| B62           | B*15:01    | nRASQ61K           | ILDTAGKEEY      | 46.8                | 0.1     | 52.5                | 0.1     |
| E             | E*01:03    | β-E01              | RLPAKAP(βF)L    | 49.2                | 0.1     | 51.1                | 0.1     |
| G             | G*01:01    | β-G01              | KYIHSAN(βF)L    | 60.4                | 0.1     | 51.0                | 0.2     |
| MR1           | MR1        | Diclofenac         | -               | -                   | -       | 51.9                | 0.1     |
|               | C262S      | Ac-6-FP            | -               | 62.1                | 0.1     | 73.2                | 0.2     |

325 **Table S2. Summary of the designed placeholder peptides and the T<sub>m</sub>.** Melting temperatures (T<sub>m</sub>) were  
326 determined for the WT and mutant HLA allotype representatives. Each allotype was refolded with a selected  
327 placeholder peptide and its T<sub>m</sub> was determined by three technical replicates.

328

| Classical HLA Alleles |                                                                                                                                                                                                                                                                                                                                                           |
|-----------------------|-----------------------------------------------------------------------------------------------------------------------------------------------------------------------------------------------------------------------------------------------------------------------------------------------------------------------------------------------------------|
| HLA-A Supertypes      |                                                                                                                                                                                                                                                                                                                                                           |
| Allele                | Protein Sequence                                                                                                                                                                                                                                                                                                                                          |
| A*02:01               | M <b>G</b> SHSMRYFFTSVSRPGRGEPFIAVGYVDDTQFVRFSDAASQRMEPRAPWIEQEGP<br>EYWDGETRKKVKAHSQTHRVDLGLTRGYYNQSEAGSHTVQRMYGCDVGS DWRFLRGYH<br>QYAYD <b>C</b> KDYIALKEDLRSWTAADMAAQTTKHKWEAAHVAEQLRAYLEGTCVEWLRRYLE<br>NGKETLQRTDAPKTHMTHHAVSDHEATLRCWALSFYPAEITLTWQRDGEDQTQDTELVE<br>TRPAGDGT <b>F</b> QKWAAVVPSGQEQRYSYCHVQHEGLPKPLTLRWEPSLHHILDAQKMVW<br>NHR      |
| A*01:01               | MAS <b>G</b> SHSMRYFFTSVSRPGRGEPFIAVGYVDDTQFVRFSDAASQKMEPRAPWIEQE<br>GPEYWDQETRNMKAHSQTDRLNGLTRGYYNQSEDSHTIQIMYGCDVGP DGRFLRGY<br>RQDAYD <b>C</b> KDYIALNEDLRSWTAADMAAQITKRKWEAVHAAEQRRVYLEGRCVDGLRRYL<br>ENGGKETLQRTDPPKTHMTHHPISDHEATLRCWALGFYPAEITLTWQRDGEDQTQDTELV<br>ETRPAGDGT <b>F</b> QKWAAVVPSGEEQRYSYCHVQHEGLPKPLTLRWELSSQPGSLHHILDAQ<br>KMWVNHR |
| A*24:02               | MAS <b>G</b> SHSMRYFSTSVSRPGRGEPFIAVGYVDDTQFVRFSDAASQRMEPRAPWIEQE<br>GPEYWDEETGKVKAHSQTDRENLRALRYYNQSEAGSHTLQMMFGCDVGS DGRFLRGY<br>HQYAYD <b>C</b> KDYIALKEDLRSWTAADMAAQITKRKWEAAHVAEQRAYLEGTCVDGLRRYL<br>ENGGKETLQRTDPPKTHMTHHPISDHEATLRCWALGFYPAEITLTWQRDGEDQTQDTELV<br>ETRPAGDGT <b>F</b> QKWAAVVPSGEEQRYSYCHVQHEGLPKPLTLRWEPSQPGSLHHILDA<br>QKMVWNHR  |
| A*29:02               | M <b>G</b> SHSMRYFFTSVSRPGRGEPFIAVGYVDDTQFVRFSDAASQRMEPRAPWIEQEGP<br>EYWDLQTRNVKAQSQTDRANLGLTRGYYNQSEAGSHTIQMMYGCDVGS DGRFLRGYR<br>QDAYD <b>C</b> KDYIALNEDLRSWTAADMAAQITQRKWEAARVAEQLRAYLEGTCVEWLRRYLE<br>NGKETLQRTDAPKTHMTHHAVSDHEATLRCWALSFYPAEITLTWQRDGEDQTQDTELVE<br>TRPAGDGT <b>F</b> QKWASVVVPSGQEQRYSYCHVQHEGLPKPLTLRWEPSLHHILDAQKMVW<br>NHR      |
| A*30:01               | M <b>G</b> SHSMRYFSTSVSRPGSGEPFIAVGYVDDTQFVRFSDAASQRMEPRAPWIEQERP<br>EYWDQETRNKVAQSQTDRVDLGLTRGYYNQSEAGSHTIQIMYGCDVGS DGRFLRGYEQ<br>HAYD <b>C</b> KDYIALNEDLRSWTAADMAAQITQRKWEAARWAEQLRAYLEGTCVEWLRRYLEN<br>GKETLQRTDPPKTHMTHHPISDHEATLRCWALGFYPAEITLTWQRDGEDQTQDTELVET<br>RPAGDGT <b>F</b> QKWAAVVPSGEEQRYSYCHVQHEGLPKPLTLRWELGSLHHILDAQKMVWN<br>HR      |
| HLA-B Supertypes      |                                                                                                                                                                                                                                                                                                                                                           |
| Allele                | Protein Sequence                                                                                                                                                                                                                                                                                                                                          |

|                               |                                                                                                                                                                                                                                                                                                                                                  |
|-------------------------------|--------------------------------------------------------------------------------------------------------------------------------------------------------------------------------------------------------------------------------------------------------------------------------------------------------------------------------------------------|
| B*07:02                       | <p>MGSHSMRYFYTSVSRPGRGEPFRFISVGYVDDTQFVRFSDAASPREEPRAPWIEQEGPE<br/> YWDRNTQIYKAQAQTDRESLRNLRGYYNQSEAGSHTLQSMYGCDVGPDRLLRGHDQY<br/> AYDCKDYIALNEDLRSWTAADTAAQITQRKWEAAREAEQRRAYLEGECEVWLRRLRYLENG<br/> KDKLERADPPKTHVTHHPISDHEATLRCWALGFYPAEITLTWQRDGEDQTQDTELVETRP<br/> AGDRTFQKWAAVVVPSGEEQRYTCHVQHEGLPKPLTLRWEPSSQSGSLHHILDAQKMV<br/> WNHR</p> |
| B*08:01                       | <p>MASGSHSMRYFDTAMSRPGRGEPFRFISVGYVDDTQFVRFSDAASPREEPRAPWIEQE<br/> GPEYWDRNTQIFKTNTQTDRESLRNLRGYYNQSEAGSHTLQSMYGCDVGPDRLLRGH<br/> NQYAYDCKDYIALNEDLRSWTAADTAAQITQRKWEAARVAEQDRAYLEGTCVEWLRRLY<br/> ENKDTLERADPPKTHVTHHPISDHEATLRCWALGFYPAEITLTWQRDGEDQTQDTELVE<br/> TRPAGDRTFQKWAAVVVPSGEEQRYTCHVQHEGLPKPLTLRWEPSSQSGSLHHILDAQK<br/> MVWNHR</p>  |
| B*15:01                       | <p>MGSHSMRYFYTAMSRPGRGEPFRFIAVGYVDDTQFVRFSDAASPRMAPRAPWIEQEGP<br/> EYWDRETQISKNTNTQTYRESLRNLRGYYNQSEAGSHTLQRMYGCDVGPDRLLRGHDQ<br/> SAYDCKDYIALNEDLSSWTAADTAAQITQRKWEAAREAEQWRAYLEGLCVEWLRRLYEN<br/> GKETLQRADPPKTHVTHHPISDHEATLRCWALGFYPAEITLTWQRDGEDQTQDTELVETR<br/> PAGDRTFQKWAAVVVPSGEEQRYTCHVQHEGLPKPLTLRWEPSSQSGSLHHILDAQKM<br/> VWNHR</p>  |
| B*37:01                       | <p>MGSHSMRYFHTSVSRPGRGEPFRFISVGYVDDTQFVRFSDAASPRTEPRAPWIEQEGPE<br/> YWDRETQISKNTNTQTYREDLRTLLRYYNQSEAGSHTIQRMSGCDVGPDRLLRGYNQFA<br/> YDCKDYIALNEDLSSWTAADTAAQITQRKWEAARVAEQDRAYLEGTCVEWLRRLYLENGK<br/> ETLQRADPPKTHVTHHPISDHEATLRCWALGFYPAEITLTWQRDGEDQTQDTELVETRPA<br/> GDRTFQKWAAVVVPSGEEQRYTCHVQHEGLPKPLTLRWEPGSLHHILDAQKMVWNHR</p>           |
| B*38:01                       | <p>MGSHSMRYFYTSVSRPGRGEPFRFISVGYVDDTQFVRFSDAASPREEPRAPWIEQEGPE<br/> YWDRNTQISKNTNTQTYRENLRIALRYYNQSEAGSHTLQRMYGCDVGPDRLLRGHNQFA<br/> YDCKDYIALNEDLSSWTAADTAAQITQRKWEAARVAEQLRTYLEGTCVEWLRRLYLENGK<br/> ETLQRADPPKTHVTHHPISDHEATLRCWALGFYPAEITLTWQRDGEDQTQDTELVETRPA<br/> GDRTFQKWAAVVVPSGEEQRYTCHVQHEGLPKPLTLRWEPGSLHHILDAQKMVWNHR</p>           |
| B*58:01                       | <p>MGSHSMRYFYTAMSRPGRGEPFRFIAVGYVDDTQFVRFSDAASPRTEPRAPWIEQEGP<br/> EYWDGETRNMKASAQTYRENLRIALRYYNQSEAGSHIIQRMYGCDLGPDRLLRGHDQS<br/> AYDCKDYIALNEDLSSWTAADTAAQITQRKWEAARVAEQLRAYLEGLCVEWLRRLYLENG<br/> KETLQRADPPKTHVTHHPVSDHEATLRCWALGFYPAEITLTWQRDGEDQTQDTELVETR<br/> PAGDRTFQKWAAVVVPSGEEQRYTCHVQHEGLPKPLTLRWEPGSLHHILDAQKMVWNH<br/> R</p>      |
| HLA-Ib & Nonclassical Alleles |                                                                                                                                                                                                                                                                                                                                                  |
| Allele                        | Protein Sequence                                                                                                                                                                                                                                                                                                                                 |

|              |                                                                                                                                                                                                                                                                                                                                              |
|--------------|----------------------------------------------------------------------------------------------------------------------------------------------------------------------------------------------------------------------------------------------------------------------------------------------------------------------------------------------|
| E*01:03      | <p>MGSHSLKYFHTSVSRPGRGEPFRFISVGYVDDTQFVRFNDNDAASPRMVPRAPWMEQEGS<br/> EYWDRETRSARDTAQIFRVNLRTLGRYYNQSEAGSHTLQWMHGCELGPDGRFLRGYEQ<br/> FAYDCKDYLTNEDLRSWTAVDTAAQISEQKSNDAEAEHQRAYLEDTCVEWLHKYLEK<br/> GKETLLHLEPPKTHVTHHPISDHEATLRCWALGFYPAEITLTWQQDGEGHTQDTELVETR<br/> PAGDGTQKWAAVVPSGEEQRYTCHVQHEGLPEPVTLRWEPGSGGGLNDIFEAQKIE<br/> WHE</p>  |
| G*01:01      | <p>MGSHSMRYFSAAVSRPGRGEPFIAMGYVDDTQFVRFSDSDASPRMEPRAPWVEQEG<br/> PEYWEEETRNTKAHAQTDRMNLQTLRGYYNQSEASSHTLQWMIGCDLGS DGR LIRGYE<br/> RYAYDCKDYLLNEDLRSWTAADTAAQISKRKSEANVAEQRRAYLEGTCVEWLHRYLE<br/> NGKEMLQRADPPKTHVTHHPVFDYEATLRCWALGFYPAEILTQWRDGEDQTQDVELVE<br/> TRPAGDGTQKWAAVVPSGEEQRYTCHVQHEGLPEPLMLRWKQGSLLHILDAQKMV<br/> WNHR</p>      |
| F*01:01      | <p>MGSHSLRYFSTAVSRPGRGEPRIAYVEYVDDTQFLRFSDAAIPRMEPREPWVEQEGPQ<br/> YWEWTTGYAKANAQTDRVALRNLLRRYNQSEAGSHTLQGMNGCDMGPDRLLRGRYHQ<br/> HAYDCKDYISLNEDLRSWTAADTVAQITQRFYEAEEYAEFRTYLEGECELLRRYLENGK<br/> ETLQRADPPKAHVAHHPISDHEATLRCWALGFYPAEITLTWQRDGEETQDTELVETRPA<br/> GDGTQKWAAVVPSGEEQRYTCHVQHEGLPQLILRWEQSPQPTIPIGSLHHILDAQKM<br/> VWNHR</p> |
| MR1<br>C262S | <p>MRTSLRYFRLGVSDPIHGVPEFISVGYVDSHPITTYDSVTRQKEPRAPWMAENLAPDHW<br/> ERYTQLLRGWQQMFKVELKRLQRHYNHSGSHTYQRMIGCELLEDGSTTGFLQYAYDCKQ<br/> DFLIFNKDTLSWLAVDNVAHTIKQAWEANQHHELLYQKNWLEEECIAWLKRFLEYGKDTLQ<br/> RTEPPLVRVNRKETFPGVTFCKAHGFYPPEIYMTWMKNGEEIVQEIDYGDILPSGDGTY<br/> QAWASIELDPQSSNLYSCHVEHSGVHMLVQVPGSLHHILDAQKMVWNHR</p>               |
| CD1d         | <p>MAEVPQRLFPLRSLQISSFANSSWTRTDGLAWLGELQTHSWSNDSDTVRS LKPWSQ<br/> GTFSDQQWETLQHIFRVYRSSFTRDVKEFAKMLRLSYPLELQVSAGCEVHPGNASN<br/> NFFHVAFQCKDILSFQGTWEPTQEAPLWVNLAIQVLNQDKWTRETVQWLLNGTCP<br/> QFVSGLLESKSELKKQVKPKAWLSRGPSPGPRLLLCHVSGFYKPKVWVKWMR<br/> GEQEQQGTQPGDILPNADETWYLRATLDVVAGEAAGLSCRVKHSSLEGQDIVLYWG<br/> GGGGLNDIFEAQKIEWHE</p>  |
| $\beta_2m$   | <p>MIQRTPKIQVYSRHPAENGKSNFLNCYVSGFCPSDIEVDLLKNGERIEKVEHSDLSFSKDW<br/> SFYLLYYTEFTPTTEKDEYACRVNHVTL SQPKIVKWDRDM</p>                                                                                                                                                                                                                          |

329 **Table S3. A summary of open MHC-I and  $\beta_2m$  sequences used in the study.** Below are the protein  
330 sequences for the representative alleles from each HLA supertype. Cysteine mutations are colored in red.

| Peptide Name | HLA Allotype | Sequence        |
|--------------|--------------|-----------------|
| FITC-A01     | A*01:01      | FITC-KSDPIVAQY  |
| TAMRA-TAX9   | A*02:01      | TAMRA-KLFGYPVYV |
| TAMRA-PHOX2B | A*24:02      | TAMRA-KYNPIRTTF |
| FITC-A29     | A*29:02      | FITC-KLIDVFHQY  |
| FITC-A30     | A*30:01      | FITC-KTFPPTEPK  |
| FITC-B07     | B*07:02      | FITC-KPPIFIRRL  |
| FITC-B08     | B*08:01      | FITC-KLRGRAYGL  |
| FITC-B38     | B*38:01      | FITC-KHIPGDTLF  |
| FITC-B37     | B*37:01      | FITC-KEDLRVSSF  |
| FITC-B58     | B*58:01      | FITC-KSTLQEQIGW |
| FITC-B15     | B*15:01      | FITC-KQDIYRASY  |
| FITC-E01     | E*01:03      | FITC-KLPAKAPLL  |
| FITC-G01     | G*01:01      | FITC-KYIHSANVL  |

331 **Table S4. A summary of the fluorophore-labeled peptides used in the study.**
